# Supplementary material for: Stay in Touch—The Cortical ER of Moss Protonemata in Osmotic Stress Situations
Source: MDPI journal article supplement (doi:10.3390/plants9040421), 2020-03-30
Supplement: s1 [file s1]

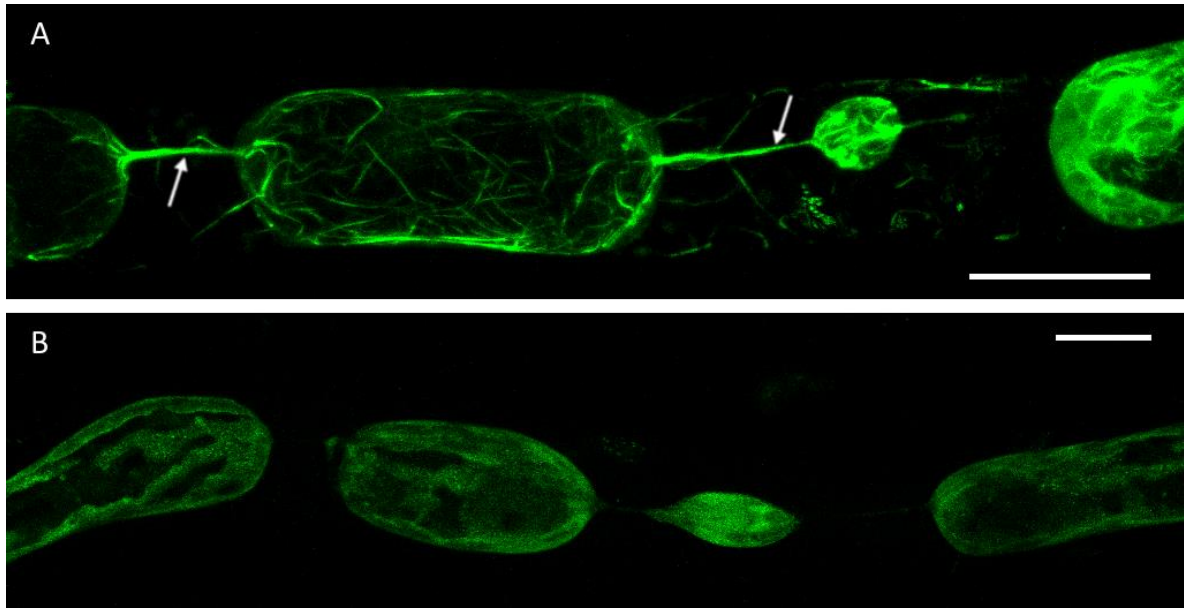

**Supplemental Figure 1.** *P. patens* cell line expressing GFP::Actin after plasmolysis. **A)** the protonema cells show filamentous actin and the subprotoplasts remain connected by strands with bright actin content (arrows). **B)** after 30 min treatment with 1  $\mu$ M LatB, actin filaments were destroyed and non-specific GFP-fluorescence appeared in the cytoplasm and around the chloroplasts (**B**). Scale bars 20 $\mu$ m.
